# Supplementary material for: A dual-mode sensing platform for electron spin resonance and UV-vis detection of alkaline phosphatase based on Cu-based metal–organic frameworks
Source: Royal Society of Chemistry journal article supplement (doi:10.1039/d4ay01682c), 2024-01-01
Supplement: d4ay01682c1.pdf [file d4ay01682c1.pdf]

1 **Dual-mode sensing platform for electron spin resonance and UV-vis**  
2 **detection of alkaline phosphatase based on Cu-based metal-organic**  
3 **frameworks**

4

5 Hui Shi,<sup>#a</sup> Yuntong Liu,<sup>#b</sup> Chu Qiu,<sup>b</sup> Chunyu Wang,<sup>c</sup> Zhimin Zhang,<sup>ad</sup> Meijun Lu,<sup>a</sup> Bo  
6 Wang,<sup>b</sup> Yuan Tian,<sup>a</sup> Daqian Song<sup>a</sup> and Ziwei Zhang<sup>\*a</sup>

7

8 <sup>a</sup>College of Chemistry, Jilin Province Research Center for Engineering and  
9 Technology of Spectral Analytical Instruments, Jilin University, Qianjin Street 2699,  
10 Changchun 130012, PR China

11 <sup>b</sup>College of Chemistry, Jilin University, Qianjin Street 2699, Changchun 130012, PR  
12 China

13 <sup>c</sup>State Key Laboratory of Supramolecular Structure and Materials, Jilin University,  
14 Qianjin Street 2699, Changchun 130012, PR China

15 <sup>d</sup>Department of Pharmacy, Changchun Medical College, Changchun 130031, China

16

17 <sup>#</sup>These authors contributed equally to this work.

18

19 Corresponding author: Ziwei Zhang

20 Tel.: +86 13610709861; fax: +86 431 85112355

21 Email: zzw@jlu.edu.cn

22 **Table of Contents**

23 **Figure S1.** Variation of the catalytic activity of Cu-MOFs as peroxidase mimic on  
24 temperature (a) and pH of the reaction solution (b). S3

25 **Figure S2.** Variation of the ESR signal of ABTS<sup>•+</sup> with the concentration of PPI (a),  
26 the pH of the reaction solution (b), and the incubation temperature for the catalytic  
27 reaction between Cu-MOFs and its substrates (c). S4

28 **Figure S3.** The stability of the ESR signal of ABTS<sup>•+</sup>. Cu-MOFs, 6 μg mL<sup>-1</sup>; H<sub>2</sub>O<sub>2</sub>, 6  
29 mmol L<sup>-1</sup>; ABTS, 4 mmol L<sup>-1</sup>. To prevent the further generation of new ABTS<sup>•+</sup> by  
30 the catalysis of Cu-MOFs, the sample was kept in the ice bath before ESR  
31 measurement.

32 S5

33 **Figure S4.** UV-vis signals at 740 nm in the presence of interfering substances (PO<sub>4</sub><sup>3-</sup>, HPO<sub>4</sub><sup>2-</sup>  
34 and H<sub>2</sub>PO<sub>4</sub><sup>-</sup>, 250 mmol L<sup>-1</sup>; Cl<sup>-</sup>, CO<sub>3</sub><sup>2-</sup> and SO<sub>4</sub><sup>2-</sup>, 100 mmol L<sup>-1</sup>; BSA, 100 nmol L<sup>-1</sup>; GOx and  
35 ChOx, 3000 U L<sup>-1</sup>).

36 S6

37 **Table S1.** Comparison of two kinetic parameters ( $K_m$  and  $V_{max}$ ) of the synthesized Cu-  
38 MOFs with HRP and nanoenzymes reported in the literatures. S7

39 **References** S8

40

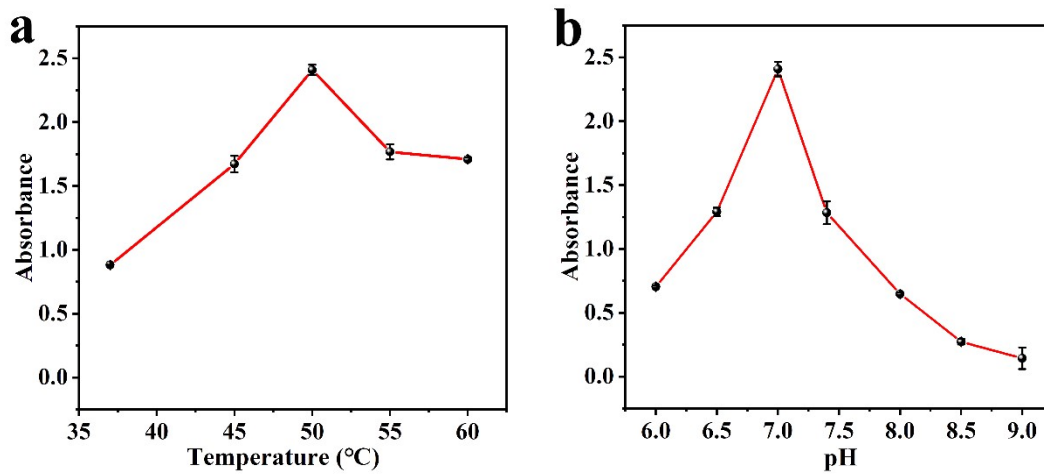

41

42 **Figure S1.** Variation of the catalytic activity of Cu-MOFs as peroxidase mimic with  
43 temperature (a) and the pH of the reaction solution (b).

44

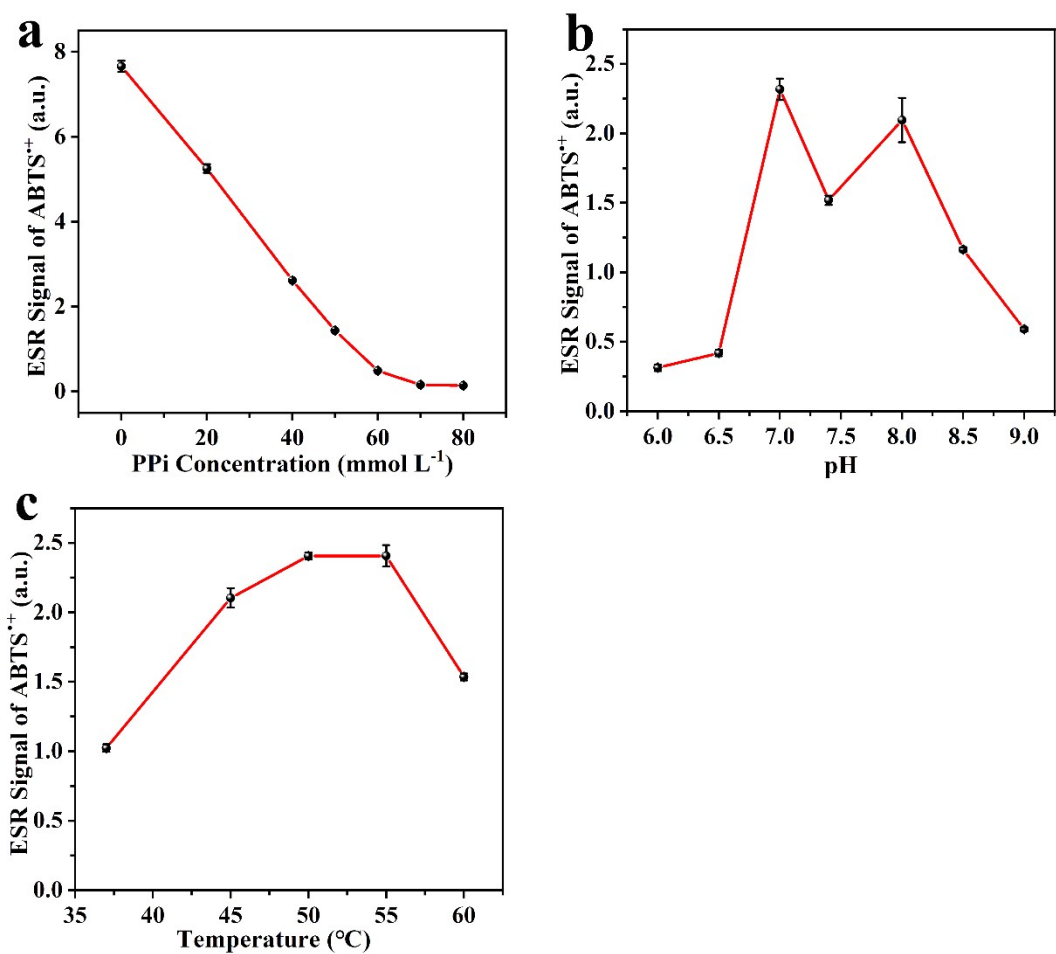

45

46 **Figure S2.** Variation of the ESR signal of ABTS<sup>•+</sup> with the concentration of PPI (a),  
 47 the pH of the reaction solution (b), and the incubation temperature for the catalytic  
 48 reaction between Cu-MOFs and its substrates (c). In (b) and (c), ALP concentration  
 49 was set at 18 U L<sup>-1</sup>.

50

51

52

53

54

55

56

57

58

59

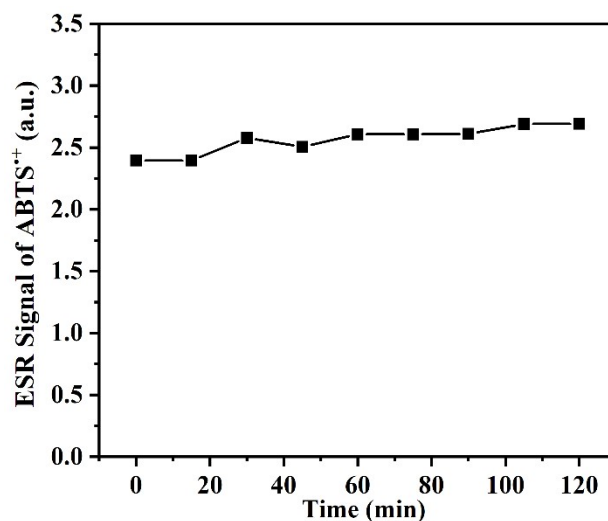

60

61 **Figure S3.** The stability of the ESR signal of ABTS<sup>•+</sup>. Cu-MOFs, 6 μg mL<sup>-1</sup>; H<sub>2</sub>O<sub>2</sub>, 6  
62 mmol L<sup>-1</sup>; ABTS, 4 mmol L<sup>-1</sup>. To prevent the further generation of new ABTS<sup>•+</sup> by  
63 the catalysis of Cu-MOFs, the sample was kept in the ice bath before ESR  
64 measurement.

65

66

67

68

69

70

71

72

73

74

75

76

77

78

79

80

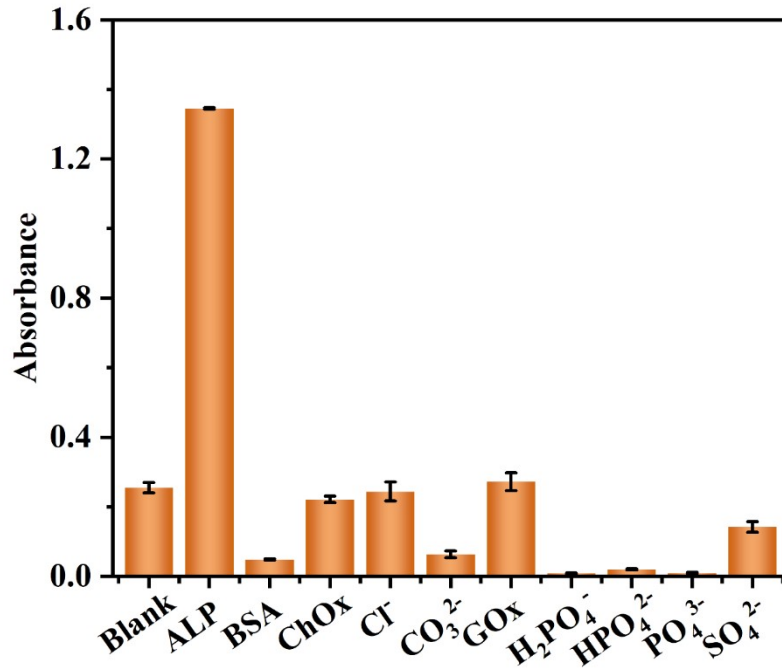

81

82 **Figure S4.** UV-vis signals at 740 nm in the presence of interfering substances ( $\text{PO}_4^{3-}$ ,  
 83  $\text{HPO}_4^{2-}$  and  $\text{H}_2\text{PO}_4^-$ , 250 mmol L<sup>-1</sup>;  $\text{Cl}^-$ ,  $\text{CO}_3^{2-}$  and  $\text{SO}_4^{2-}$ , 100 mmol L<sup>-1</sup>; BSA, 100  
 84 nmol L<sup>-1</sup>; GOx and ChOx, 3000 U L<sup>-1</sup>).

85

86

87 **Table S1.** Comparison of two kinetic parameters ( $K_m$  and  $V_{max}$ ) of the synthesized Cu-  
 88 MOFs with HRP and nanoenzymes reported in the literatures.

| <b>Catalyst</b>                                 | <b>Substrate</b>              | <b><math>K_m</math><br/>(mmol L<sup>-1</sup>)</b> | <b><math>V_{max}</math><br/>(10<sup>-7</sup> mol L<sup>-1</sup> s<sup>-1</sup>)</b> | <b>Ref.</b> |
|-------------------------------------------------|-------------------------------|---------------------------------------------------|-------------------------------------------------------------------------------------|-------------|
| Au <sub>1</sub> Ag <sub>1</sub> Pd <sub>1</sub> | ABTS                          | 71.53                                             | 36.5                                                                                | 1           |
|                                                 | H <sub>2</sub> O <sub>2</sub> | 0.011                                             | 0.123                                                                               |             |
| MgFe <sub>2</sub> O <sub>4</sub>                | ABTS                          | 0.14                                              | 1.254                                                                               | 1           |
|                                                 | H <sub>2</sub> O <sub>2</sub> | 4.61                                              | 1.346                                                                               |             |
| Cys-MoS <sub>2</sub>                            | ABTS                          | 0.15                                              | 1.61                                                                                | 2           |
|                                                 | H <sub>2</sub> O <sub>2</sub> | 8.06                                              | 9.92                                                                                |             |
| raw MoS <sub>2</sub>                            | ABTS                          | 0.97                                              | 0.63                                                                                | 2           |
|                                                 | H <sub>2</sub> O <sub>2</sub> | 6.74                                              | 1.92                                                                                |             |
| HRP                                             | ABTS                          | 3.07                                              | 149                                                                                 | 3           |
|                                                 | H <sub>2</sub> O <sub>2</sub> | 0.342                                             | 54.6                                                                                |             |
| Cu-MOFs                                         | ABTS                          | 4.38                                              | 0.713                                                                               | This work   |
|                                                 | H <sub>2</sub> O <sub>2</sub> | 2.38                                              | 4.79                                                                                |             |

89

91 **References:**

92 1. J. Kong, J. Zheng, Li Z., J. Huang, F. Cao, Q. Zeng and F. Li, *Anal. Bioanal. Chem.*,  
93 2021, **413**, 5383-5393.

94 2. J. Yu, D. Ma, L. Mei, Q. Gao, W. Yin, X. Zhang, L. Yan, Z. Gu, X. Ma and Y.  
95 Zhao, *J. Mat. Chem. B*, 2018, **6**, 487-498.

96 3. R. Li, Y. Zhou, L. Zou, S. Li, J. Wang, C. Shu, C. Wang, J. Ge and L. Ling, *Sens.*  
97 *Actuator B-Chem.*, 2017, **245**, 656-664.

98
